# Supplementary material for: A hydridoirida-β-diketone as an efficient and robust homogeneous catalyst for the hydrolysis of ammonia–borane or amine–borane adducts in air to produce hydrogen
Source: Royal Society of Chemistry journal article supplement (doi:10.1039/c0dt00091d), 2010-01-01
Supplement: c0dt00091d.pdf [file c0dt00091d.pdf]

## Supplementary Information

**A hydrido-iridium- $\beta$ -diketone as efficient and robust homogeneous catalyst for the hydrolysis of ammonia-borane or amine-borane adducts in air to produce hydrogen.**

*Roberto Ciganda,<sup>a</sup> María A. Garralda,<sup>a</sup> Lourdes Ibarlucea,<sup>a</sup> Elena Pinilla,<sup>b</sup> M. Rosario Torres<sup>b</sup>*

<sup>a</sup>*Facultad de Química de San Sebastián, Universidad del País Vasco, Manuel de Lardizábal, 3, San Sebastián, Spain*

<sup>b</sup>*Departamento de Química Inorgánica, Laboratorio de Difracción de Rayos X, Facultad de Ciencias Químicas, Universidad Complutense, 28040 Madrid, Spain*

|                                                                                 |   |
|---------------------------------------------------------------------------------|---|
| Experimental procedures                                                         | 2 |
| NMR Identification of boron and of iridium species after the catalytic reaction | 4 |
| Reaction of <b>1</b> with amines                                                | 7 |
| NMR Spectroscopy of the catalyzed reaction                                      | 8 |

**General Procedures.** The hydrolytic dehydrogenation reactions were carried out at room temperature under air.  $[\text{IrHCl}\{(\text{PPh}_2(o\text{-C}_6\text{H}_4\text{CO}))_2\text{H}\}]$  (**1**)<sup>1</sup> was prepared as previously reported by the reaction of  $[\text{IrCl}(\text{Cod})]_2$ <sup>2</sup> (Cod = 1,5-cyclooctadiene) and *o*-(diphenylphosphine)benzaldehyde.<sup>3</sup> Ammonia-borane and amino-boranes were purchased and used as received. The preparation of the metal complexes was carried out at room temperature under nitrogen by standard Schlenk techniques. Microanalysis was carried out with a Leco CHNS-932 microanalyser. <sup>1</sup>H and <sup>13</sup>C{<sup>1</sup>H} (TMS internal standard), <sup>31</sup>P{<sup>1</sup>H} (H<sub>3</sub>PO<sub>4</sub> external standard) and <sup>11</sup>B{<sup>1</sup>H} (BF<sub>3</sub>·OEt<sub>2</sub> external standard) spectra were recorded with a Bruker Avance DPX 300 spectrometer.

**Dehydrogenation of RR'R''N—BH<sub>3</sub> with catalyst 1.** A typical dehydrogenation experiment is described here for the hydrolysis of H<sub>3</sub>N—BH<sub>3</sub> using THF/H<sub>2</sub>O = 1/1 mixtures and 0.5 mol% catalyst loading: A solution of 42.5 mg (1.38 mmol) of H<sub>3</sub>N—BH<sub>3</sub> in 1.5 ml of H<sub>2</sub>O was prepared in a round bottom 40 ml flask fitted with a gas outlet and with a side arm sealed with a tight-fitting septum cap. The flask was connected via the gas outlet to a water-filled gas burette. A solution of 5.5 mg (0.0068 mmol) of **1** in 1.5 ml of dry THF was then syringed through the septum, magnetic stirring was connected and timing started. Gas evolution began immediately and the amount of gas evolved was determined periodically by measuring the displacement of water in the burette. 3.0 equivalents of hydrogen occupy 100 ml at atmospheric pressure. Volumes were measured at atmospheric pressure and corrected for water vapor pressure at 20°C. The procedure was repeated at different THF/H<sub>2</sub>O ratios using always a total volume of 3 ml. Figure S1 shows the release of hydrogen using different THF/H<sub>2</sub>O mixtures. The procedure was repeated at different catalyst loadings by modifying the amount of iridium.

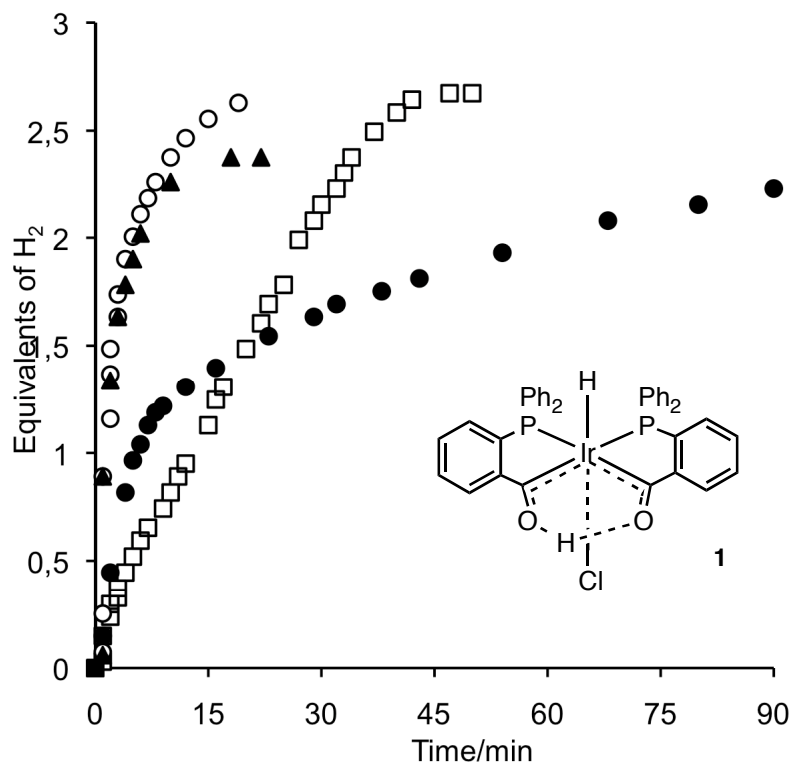

FIGURE S1. Hydrogen release from H<sub>3</sub>NBH<sub>3</sub> using 0.5 mol% of **1** as catalyst in THF/H<sub>2</sub>O mixtures: 85/15 (□); 50/50 (○); 40/60 (▲) or 30/70 (●).

- (1) M. A. Garralda, R. Hernández, L. Ibarlucea, E. Pinilla and M. R. Torres, *Organometallics*, 2003, **22**, 3600
- (2) J. L. Herde, J. C. Lambert and C. V. Senoff, *Inorg. Synth.*, 1974, **15**, 18;
- (3) S. Laue, L. Greiner, J. Wöltinger and A. Liese, *Adv. Synth. Catal.*, 2001, **343**, 711.

### NMR Identification of iridium species after the catalytic reaction.

a) After completion of the catalytic reaction using THF/H<sub>2</sub>O = 1/1 mixtures, elimination of THF afforded a yellow solid that was decanted and vacuum dried. The <sup>1</sup>H and <sup>31</sup>P{<sup>1</sup>H} NMR spectra of this solid in THF-d<sub>8</sub> solution were recorded (see Figure S2).

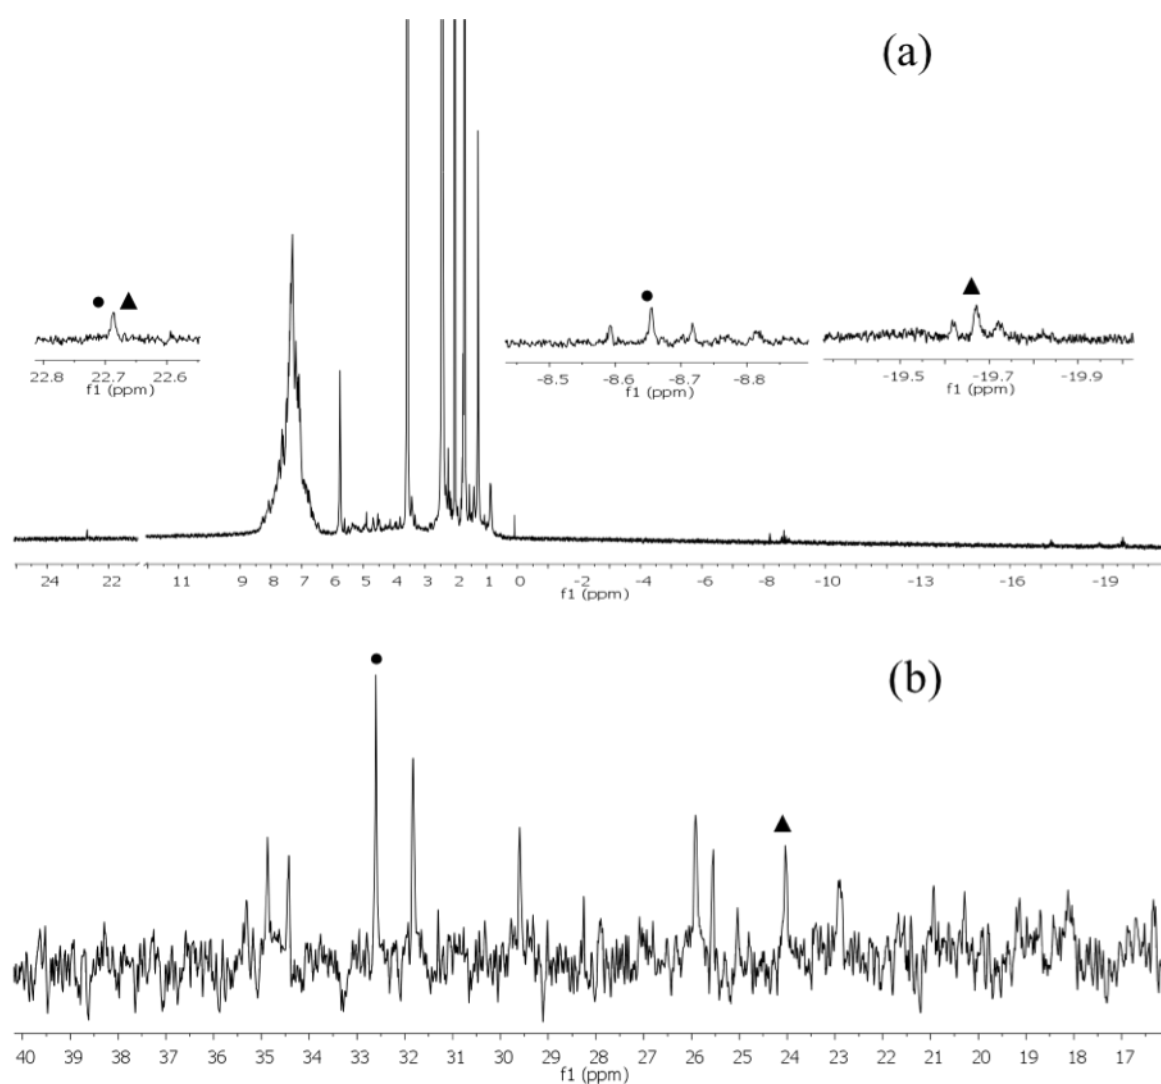

Figure S2. <sup>1</sup>H (a) and <sup>31</sup>P{<sup>1</sup>H} (b) NMR spectra (THF-d<sub>8</sub>) of the yellow solid recovered after the dehydrogenation of NH<sub>3</sub>BH<sub>3</sub> with **1** (THF/H<sub>2</sub>O = 1/1), upon elimination of THF. (▲) [IrHCl{(PPh<sub>2</sub>(o-C<sub>6</sub>H<sub>4</sub>CO)<sub>2</sub>H)}]; (●) [IrH<sub>2</sub>{(PPh<sub>2</sub>(o-C<sub>6</sub>H<sub>4</sub>CO)<sub>2</sub>H)}].

b) When the catalytic reaction was performed using THF/H<sub>2</sub>O = 4/6 mixtures, a solid was formed, which was decanted and vacuum dried. The <sup>1</sup>H and <sup>31</sup>P{<sup>1</sup>H} NMR spectra of this solid in THF-d<sub>8</sub> solution were recorded (see Figure S3).

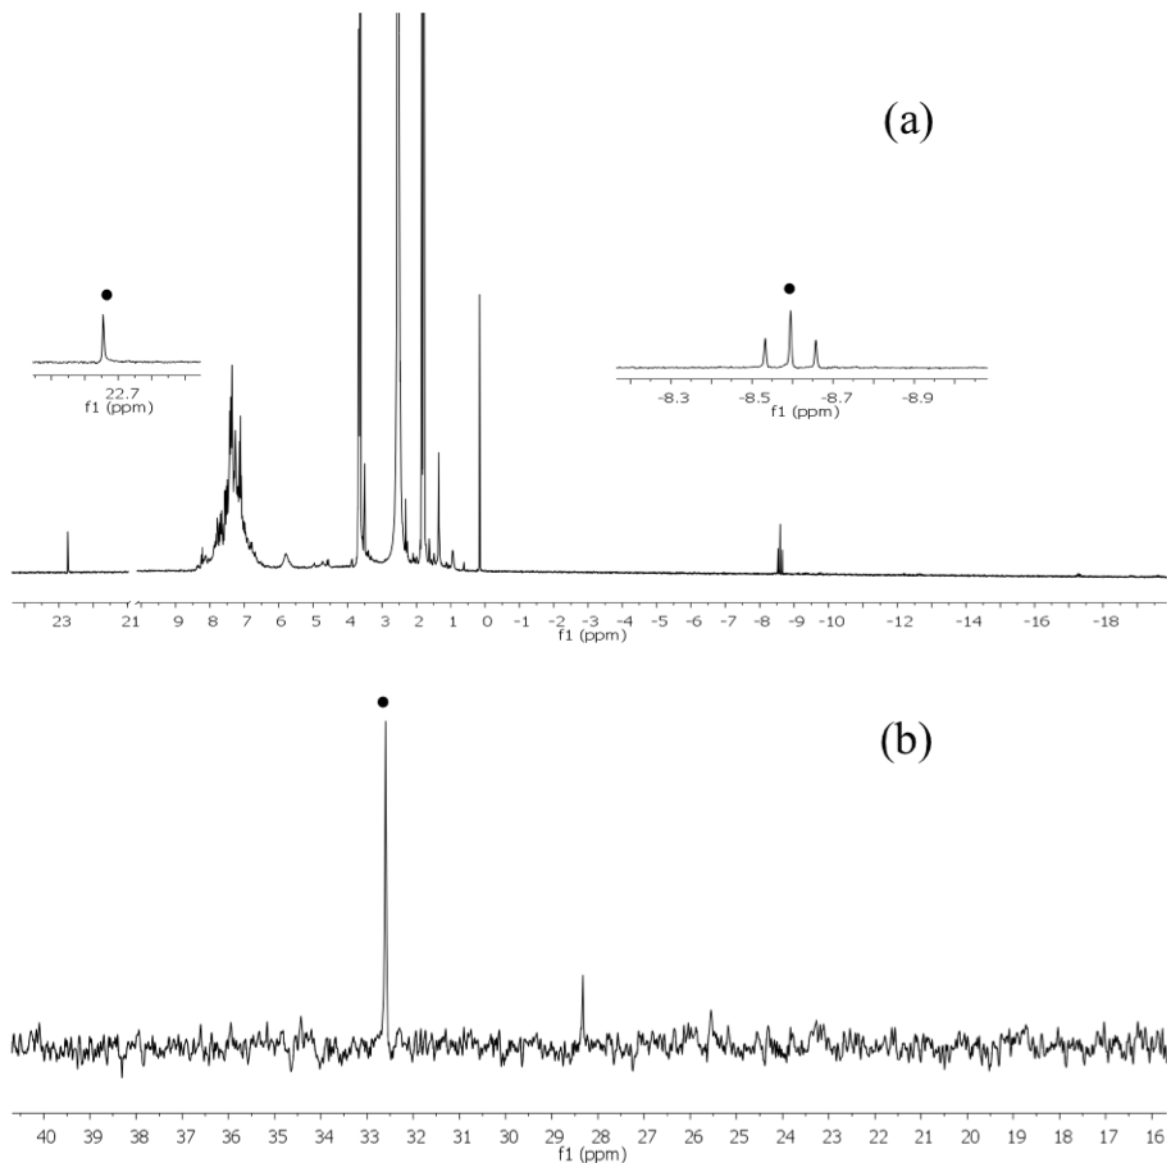

Figure S3. <sup>1</sup>H (a) and <sup>31</sup>P{<sup>1</sup>H} (b) NMR spectra (THF-d<sub>8</sub>) of the yellow solid formed during the dehydrogenation of NH<sub>3</sub>BH<sub>3</sub> with **1** THF/H<sub>2</sub>O = 4/6, (•) [IrH<sub>2</sub>{(PPh<sub>2</sub>(o-C<sub>6</sub>H<sub>4</sub>CO)<sub>2</sub>H)}].

**NMR Characterization of boron species after the catalytic reaction.** After completion of the catalytic reactions, a sample of the reaction mixture was transferred into a NMR tube and the  $^{11}\text{B}\{^1\text{H}\}$  NMR spectrum was recorded. The spectrum obtained was compared with that of a sample prepared by mixing 85.3 mg (1.38 mmol) of  $\text{H}_3\text{BO}_3$  with 0.110 ml of aqueous ammonia solution (25% in  $\text{NH}_3$ ) (1.38 mmol) in 3 ml of  $\text{THF}/\text{H}_2\text{O} = 1/1$  (See Figure S4).

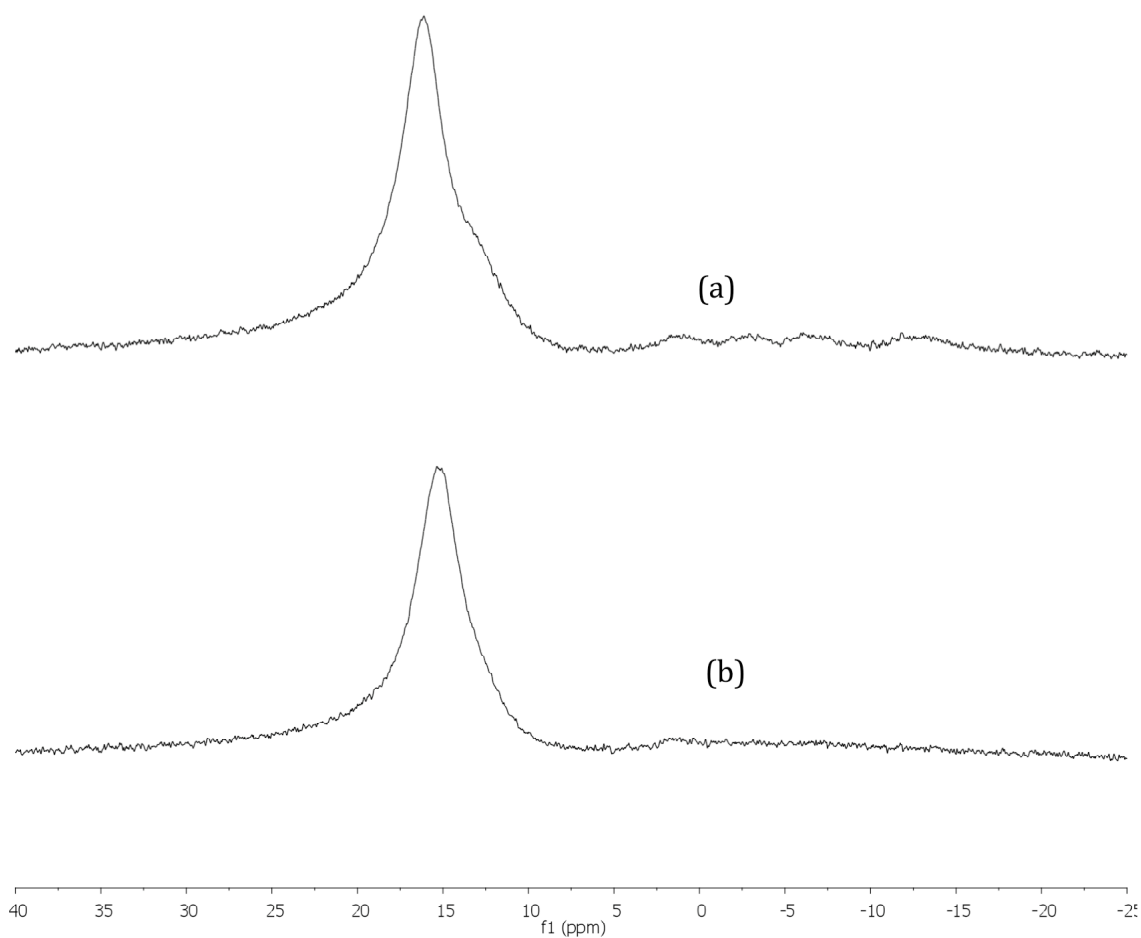

Figure S4. (a)  $^{11}\text{B}\{^1\text{H}\}$  NMR spectrum of the reaction mixture after catalytic dehydrogenation of  $\text{H}_3\text{N}-\text{BH}_3$ . (b)  $^{11}\text{B}\{^1\text{H}\}$  NMR spectrum of the sample prepared by mixing equimolar amounts of boric acid and ammonia in  $\text{THF}/\text{H}_2\text{O}$ .

### Reaction of **1** with amines.

**Formation and characterization of [IrHCl{(PPh<sub>2</sub>(*o*-C<sub>6</sub>H<sub>4</sub>CO)(PPh<sub>2</sub>(*o*-C<sub>6</sub>H<sub>4</sub>CNCH<sub>3</sub>)H)] (3).** To a THF suspension of **1** (30 mg, 0.037 mmol) was added 2.0M MeNH<sub>2</sub> solution in THF (0.15 ml, 0.074 mmol) whereupon a dissolution was obtained. Stirring during 17 h and evaporation of the solvent gave a yellow solid that was washed with diethyl ether and vacuum dried. Yield: 80%. Anal. calc. for C<sub>39</sub>H<sub>33</sub>ClIrOP<sub>2</sub>·THF: C, 57.81; H, 4.63; N, 1.57. Found: C, 57.84; H, 4.73; N, 1.46. <sup>1</sup>H NMR (CDCl<sub>3</sub>): δ –20.67 (t, 1H, <sup>2</sup>J(P,H) = 14.0 Hz, IrH), 13.22 (s, 1H, N··H··O), 3.70 (s, 3H, CH<sub>3</sub>). <sup>31</sup>P{<sup>1</sup>H} NMR (CDCl<sub>3</sub>): δ 30.8 (d), 15.0 (d, <sup>2</sup>J(P,P) = 7 Hz). <sup>13</sup>C{<sup>1</sup>H} NMR (CDCl<sub>3</sub>): δ 243.9 (d, <sup>2</sup>J(P,C) = 106 Hz, C=O), 221.8 (d, <sup>2</sup>J(P,C) = 103 Hz, C=N); 37.3 (s, CH<sub>3</sub>).

**Reaction of **3** with H<sub>2</sub>O.** To a THF solution of **3** (15 mg, 0.018 mmol) was added H<sub>2</sub>O (1 ml). Stirring during 48 h and evaporation of THF gave a yellow solid, identified by NMR as an equimolar mixture of **3** and **4**.

**Formation and characterization of [IrH(PPh<sub>2</sub>(*o*-C<sub>6</sub>H<sub>4</sub>CO)<sub>2</sub>(CH<sub>3</sub>NH<sub>2</sub>)] (4).** To a THF/H<sub>2</sub>O = 1/1 suspension of **1** (30 mg, 0.037 mmol) was added 2.0M MeNH<sub>2</sub> solution in THF (0.15 ml, 0.074 mmol). Stirring during 30 min gave a yellow solid that was decanted. The solid was recrystallised from dichloromethane/diethyl ether and vacuum dried. Yield: 70%. Anal. calc. for C<sub>39</sub>H<sub>34</sub>NIrO<sub>2</sub>P<sub>2</sub>·CH<sub>2</sub>Cl<sub>2</sub>: C, 54.12; H, 4.09; N, 1.58. Found: C, 54.44; H, 3.76; N, 1.52. <sup>1</sup>H NMR (CDCl<sub>3</sub>): δ –7.94 (dd, 1H, <sup>2</sup>J(P,H)<sub>cis</sub> = 20.0 Hz, <sup>2</sup>J(P,H)<sub>trans</sub> = 130.0 Hz, IrH), 1.39 (s, 2H, NH), 2.31 (s, 3H, CH<sub>3</sub>). <sup>31</sup>P{<sup>1</sup>H} NMR (CDCl<sub>3</sub>): δ 30.5 (d), 25.7 (d, <sup>2</sup>J(P,P) = 4 Hz). <sup>13</sup>C{<sup>1</sup>H} NMR (CDCl<sub>3</sub>): δ 239.9 (d, <sup>2</sup>J(P,C) = 102 Hz, C=O), 213.9 (d, <sup>2</sup>J(P,C) = 5 Hz, C=O); 37.3 (s, CH<sub>3</sub>).

**Reaction of **1** with NEt<sub>3</sub>.** a) To a THF suspension of **1** (20 mg, 0.025 mmol) was added NEt<sub>3</sub> (0.0068 ml, 0.050 mmol). Stirring during 24 h and evaporation of THF gave

a yellow solid identified by NMR as **1**. b) To a THF/H<sub>2</sub>O = 1/1 suspension of **1** (20 mg, 0.025 mmol) was added NEt<sub>3</sub> (0.0068 ml, 0.050 mmol). Stirring during 24 h and evaporation of THF gave a yellow solid identified by NMR as [Ir<sub>2</sub>H<sub>2</sub>(PPh<sub>2</sub>(*o*-C<sub>6</sub>H<sub>4</sub>CO))<sub>2</sub>(μ-PPh<sub>2</sub>(*o*-C<sub>6</sub>H<sub>4</sub>CO))<sub>2</sub>].<sup>4</sup>

(4) F. Acha, R. Ciganda, M. A. Garralda, R. Hernández, L. Ibarlucea, E. Pinilla and M. R. Torres, *Dalton Trans.*, 2008, 4602–4611.

**NMR Spectroscopy of the catalyzed reaction.** Glass equipment was oven-dried and cooled in a desiccator provided with P<sub>2</sub>O<sub>5</sub> before use. A pressure valve sample tube was charged with a solution of 7.5 mg (0.243 mmol) of H<sub>3</sub>N—BH<sub>3</sub> in 0.25 ml of D<sub>2</sub>O (99.96%D) and a solution of 3 mg (0.0037 mmol) of **1** in 0.75 ml of THF-d<sub>8</sub> whereupon some gas evolution was observed. The tube was introduced immediately in the spectrometer and the <sup>1</sup>H, <sup>11</sup>B{<sup>1</sup>H} and <sup>31</sup>P{<sup>1</sup>H} NMR spectra were monitored over time. (see Figure S5).



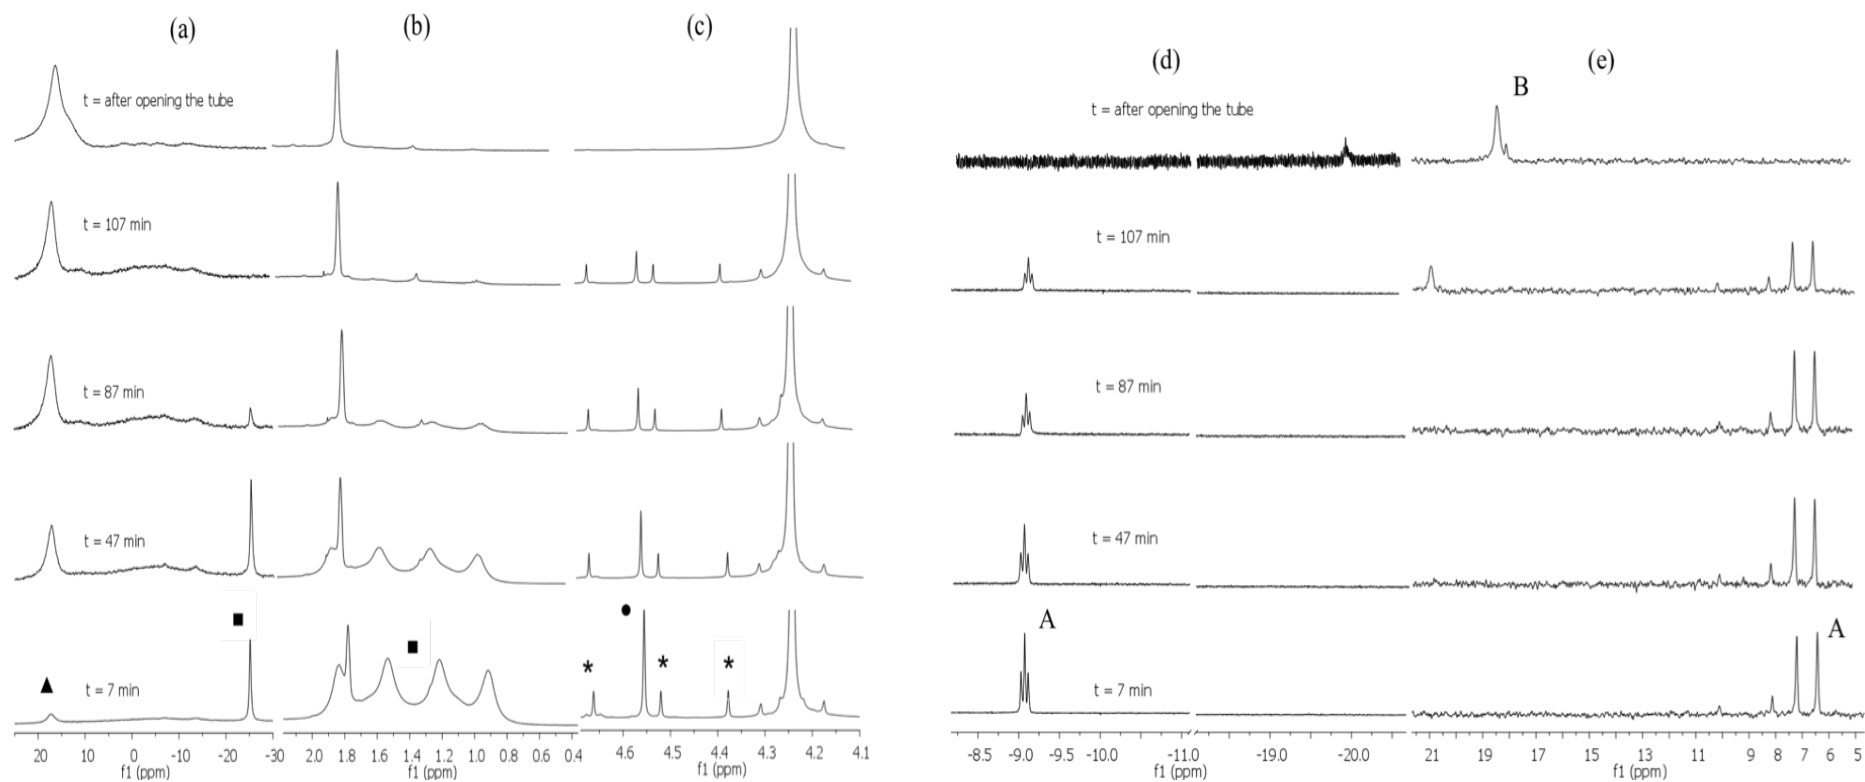

Figure S5.  $^{11}\text{B}\{^1\text{H}\}$  NMR (a),  $^1\text{H}$  NMR (b, c and d) and  $^{13}\text{P}\{^1\text{H}\}$  NMR (e) spectra of the “in situ” catalytic  $\text{NH}_3\text{BH}_3$  hydrolysis showing the gradual disappearance of  $\text{NH}_3\text{BH}_3$  (■) (a and b), the formation of borate (▲) (a) and the evolution of HD (\*) and  $\text{H}_2$  (●) (c); the initial formation of species (A) and its transformation into (B) after completion of the catalytic reaction (d and e).

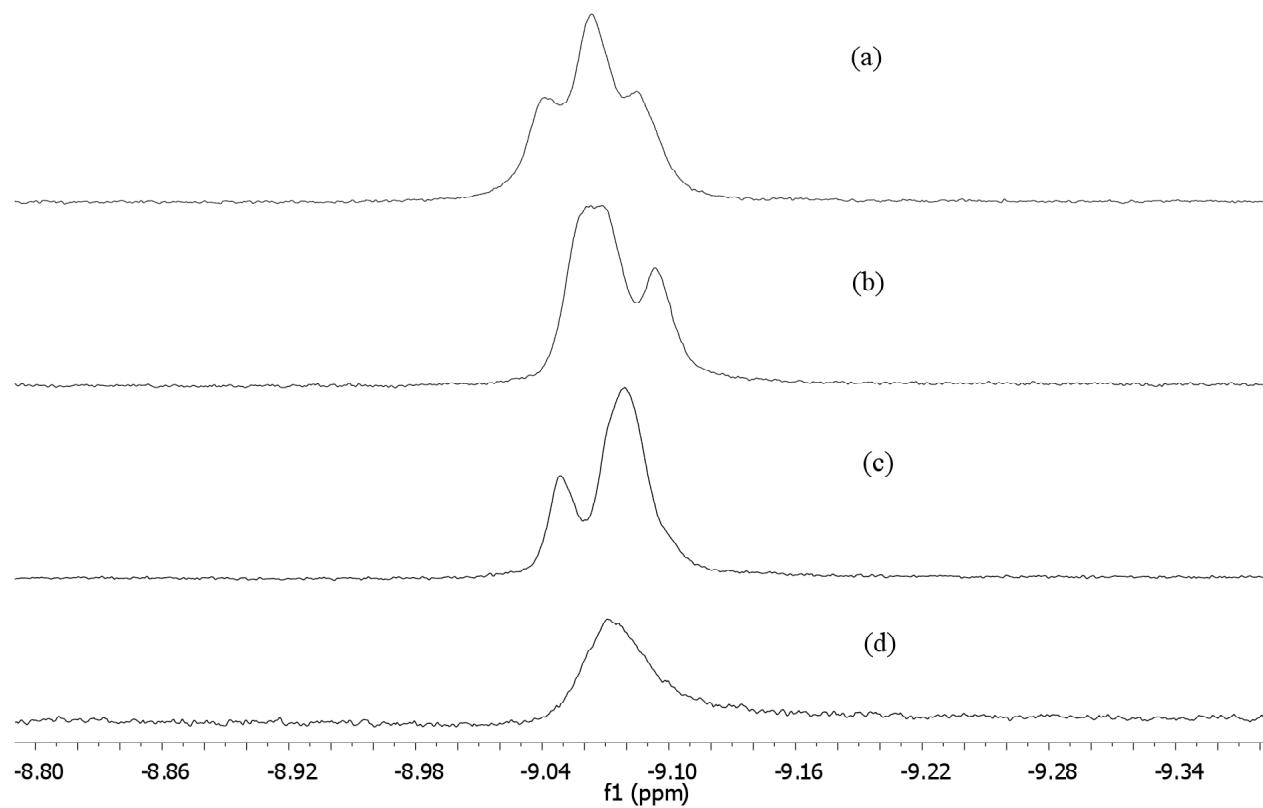

Figure S6.  $^1\text{H}$  NMR spectra of the “in situ” catalytic  $\text{NH}_3\text{BH}_3$  hydrolysis in the hydride region.  
(a)  $^1\text{H}$  NMR spectrum; (b)  $^{31}\text{P}$  irradiated at 7.31 ppm; (c)  $^{31}\text{P}$  irradiated at 6.20 ppm; (d)  $^1\text{H}\{^{31}\text{P}\}$  NMR spectrum
